# Supplementary material
Source: Springer Nature journal article supplement (https://www.springermedizin.de/resource/supplementary/12874_2012_934_MOESM4_ESM.pdf/9433146)

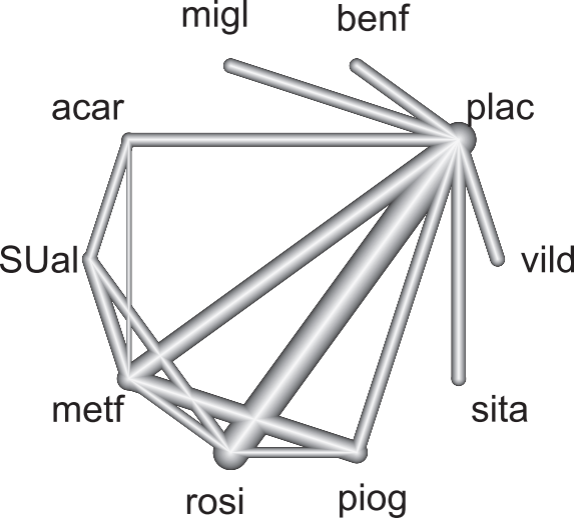

Supplement: MOESM4 [file 9433146]
